1 RESEARCH ARTICLE

# 2 **The ectomycorrhizal community of urban linden trees in** 3 **Gdańsk, Poland**

4  
5 **Jacek Olchowik<sup>1\*</sup>, Marzena Suchocka<sup>2</sup>, Paweł Jankowski<sup>3</sup>, Tadeusz Malewski<sup>4</sup>, Dorota Hilszczańska<sup>5</sup>**

6  
7 <sup>1</sup> Department of Plant Protection, Institute of Horticultural Sciences; Warsaw University of Life Sciences, Warsaw, Poland

8 <sup>2</sup> Department of Landscape Architecture, Institute of Environmental Engineering, Warsaw University of Life Sciences,  
9 Warsaw, Poland

10 <sup>3</sup> Department of Computer Information Systems, Institute of Information Technology, Warsaw University of Life Sciences,  
11 Warsaw, Poland

12 <sup>4</sup> Department of Molecular and Biometric Techniques, Museum and Institute of Zoology, Polish Academy of Science,  
13 Warsaw, Poland

14 <sup>5</sup> Department of Forest Ecology, Forest Research Institute, Sękocin Stary, Poland

15  
16 \* Correspondence author: e-mail: [jacek\\_olchowik@sggw.edu.pl](mailto:jacek_olchowik@sggw.edu.pl)

## 17 18 **Abstract**

19  
20 The linden tree (*Tilia* spp.) is a popular tree for landscaping and urban environments in central  
21 and northwest European countries, and it is one of the most popular in cities in Poland.

22 Ectomycorrhizal fungi form a symbiosis with many urban tree species and protect the host  
23 plant from heavy metals and against salinity. The aim of this study was to characterize the  
24 ECM fungal community of urban linden trees along the tree damage gradient. The study was  
25 performed on two homogeneous sites located in the centre of the city of Gdańsk, in northern  
26 Poland. The vitality assessment of urban linden trees was made according to Roloff's  
27 classification. Tree damage classes were related to soil characteristics using principal  
28 component analysis. The five ectomycorrhizal fungal species were shared among all four tree  
29 damage classes, and *Cenococcum geophilum* was found to be the most abundant and frequent  
30 ectomycorrhizal fungal species in each class. Park soil had significantly lower pH and Na, Cl  
31 and Pb content than street soils. Our knowledge of ectomycorrhizal communities in urban  
32 areas is still limited, and these findings provide new insights into ectomycorrhizal distribution  
33 patterns in urban areas.

## 34 35 **Introduction**

36  
37 The most heavily human-modified ecosystems, cities, are expanding rapidly [1]. Trees  
38 provide benefits, ensuring that sustainable urban development and environmental benefits are  
39 most valued by city managers as a reason for introducing trees into cities [2]. Nevertheless,  
40 paradoxically, they grow in often extremely distorted habitat conditions in comparison to  
41 natural conditions. Street trees are exposed to a relatively high stress level. Studies reveal that  
42 their average lifespan is shorter than that of park trees [3], with mean ranging from 19 to 28  
43 years [4] or less. The linden tree (*Tilia* spp.) is a popular tree for landscaping and urban  
44 environments in central and northwest European countries [5] and it is one of the most

45 popular in cities in Poland. Dmuchowski and Badurek [6] reported that in Warsaw during  
46 1973-2000 over 50% of trees growing alongside the four main thoroughfares in the city centre  
47 were removed. Moreover, the continuation of these studies has shown that over a period of 35  
48 years, out of the 5 species with the highest loss, 3 were *Tilia* species: *Tilia platyphyllos*, *Tilia*  
49 '*Euchlora*' and *Tilia cordata* [7]. The stresses that affect urban trees may be biotic or abiotic,  
50 mechanical damage, high temperature, soil compaction, limited soil volume for root  
51 development and drought [8,9,3]. Specifically, soil and roots may be affected by construction  
52 activities such as utility trenching, soil compaction and subsequent root deoxygenation,  
53 shortage of available water, and incorporation of anthropic materials [5,10,11]. Under stress,  
54 plant growth and photosynthesis are reduced and carbon allocation is altered, resulting in a  
55 low tree vitality [12,13,14,15,16,17].

56 Mycorrhiza is a mutualistic association because fungi form relationships in and on the  
57 roots of a host plant. Mycorrhizae protect the host plant from heavy metals and against  
58 drought [18]. Ectomycorrhizal fungi (ECM) are ecologically significant because they provide  
59 the plant with several benefits including enhanced nutrients [18] and increased water use  
60 efficiency, and enhanced root exploration. Mycorrhizal colonization has been shown to  
61 promote short root survival particularly when *Tilia* trees are exposed to drought conditions.  
62 Ectomycorrhizal fungi promote water uptake in general [e.g., 19] and have been specifically  
63 shown to play an important role in the nutrient uptake of *Tilia* spp. [20]. Mycorrhizae protect  
64 the host plant from heavy metals and promote short root survival particularly when *Tilia* trees  
65 are exposed to drought conditions [18,12]. It has been reported that this symbiosis plays a  
66 major role by increasing the efficiency of sodium-excluding mechanisms in infected roots and  
67 through higher root accumulation of phosphorus (P) [21]. The ecological distribution of fungi  
68 is markedly different from natural and urban environments, where mycorrhizal fungi have  
69 evolved and adapted. For example, Timonen and Kauppinen [22] reported that *Tilia cordata*  
70 trees growing in a nursery had different sets of ectomycorrhizal symbionts than trees grown  
71 along streets with traffic, but still the relationship between specific environmental conditions  
72 and the mycorrhizal status of trees is not well known [23].

73 The aim of this study was to characterize the ECM fungal community of urban linden  
74 trees along the tree damage gradient. We hypothesized that the ECM fungal community  
75 changes along the damage gradient, as the diversity of ECM fungi increases in accordance  
76 with tree health condition.

77

## 78 **Materials and methods**

79

### 80 **Study sites**

81

82 We performed the study on two homogeneous sites located in the centre of the city of  
83 Gdańsk, in northern Poland. The study was conducted on trees belonging to one genus, *Tilia*:  
84 Dutch Linden (*Tilia x europaea*), Fine Linden (*Tilia cordata*), and Broad-leaved Linden (*Tilia*  
85 *platyphyllos*). The first study area was located in the middle of Great Linden Avenue  
86 (54°22'05,5"N 18°37'51,2"E), which is a four-row avenue created in 1768-1770 and located

87 within the administrative borders of the City of Gdańsk. The avenue is located within one of  
88 the most important and busiest transport routes in Gdańsk. Great Linden Avenue is subject to  
89 legal protection under the Act of 16 April 2004 on Nature Conservation and the Act of 23  
90 July 2003 on Monuments Protection and Care as an object entered in the register of  
91 monuments, no. 285 of 23.02.1967. Selecting a linden alley as the research area enabled us to  
92 exclude the variable of other trees, particularly deciduous species, affecting the community  
93 dynamics of *Tilia*-associated ECM fungi. The second site was located in a park  
94 (54°22'07,68"N 18°37'57,36"E) at a distance of approximately 150 m away and separated  
95 from the road by a dense strip of bushes and hedges.

96

## 97 **Tree health assessment**

98

99 The vitality assessment of each tree was made according to Roloff's classification [24]  
100 and the health condition of the trees was estimated according to leaf and branch growth  
101 pattern. Condition evaluation was performed for each tree and was based on distal crown  
102 vigour. Trees were segregated into 4 groups: R0 'exploration' (tree in the phase of intensive  
103 offshoot growth), R1 'degeneration' (tree with slightly delayed offshoot growth), R2  
104 'stagnation' (tree with visibly delayed offshoot growth), R3 'resignation' (tree is dying,  
105 without the possibility of regeneration or returning to the second class). In the first study area,  
106 thirty street trees at least 200 m apart were classified according to the declining classes and  
107 assigned to classes R1, R2 and R3. At the park site ten trees belonging to class R0 were  
108 selected. All the trees situated along the street and in the park site were of the same age (60  
109 years).

110

## 111 **Sampling and identification of mycorrhizae**

112

113 In May 2019 soil cores were collected from both street and park trees. For each of 40  
114 trees, a total of 80 soil subsamples were collected for mycorrhizal assessment: each sample  
115 consisted of 2 microsite localities: north and south (40 trees × 2 microsite (north and south) =  
116 80 subsamples). The street root samples were taken from the 1.5 m wide grass strip between  
117 roadways. To access the root system, each sample was extricated with a cylinder  
118 (approximately 25 cm diameter, 25 cm depth) of adjacent substrate and packed in labelled  
119 plastic bags. Samples were stored at – 20 °C until further processing. Extracted root  
120 fragments were examined under a dissecting microscope at 10-60x magnification.

121 All tips were classified as 'vital ECM' (VM, with ECM mantle) 'non-vital' (NV,  
122 scurfy surface, without remnants of ECM mantle) or 'vital non-ECM' (NM, well-developed,  
123 and mantle lacking) [25]. Mycorrhizae were classified into morphotypes based on  
124 morphological characters (colour, shape, texture, and thickness of the mantle, presence and  
125 organization of the emanating hyphae, rhizomorphs, and other elements) according to Agerer  
126 [26], and the experience of the researchers involved in this study [27]. The degree of  
127 mycorrhization of linden roots, abundance, relative abundance and frequency of individual  
128 ectomycorrhizal fungal taxa were determined according to Olchowik et al. [27]. Each

129 morphotype was treated separately during molecular identification and was pooled for  
130 calculation of abundance only after molecular analysis indicated that morphotypes belonged  
131 to the same taxa. The internal transcribed spacer (ITS) region of the rDNA was amplified  
132 using the primers ITS1F and ITS4 [28,29] and the product of the polymerase chain reaction  
133 (PCR) was sequenced. The full methods used for molecular identification of mycorrhizae are  
134 reported by Olchowik et al. [30]. The best representatives of each unique ITS sequences were  
135 deposited in NCBI GenBank with the accession numbers.

136

## 137 **Physicochemical analysis of the soil**

138

139 The samples for soil chemical analysis were taken at the beginning of May 2019. The  
140 samples were collected from 30 trees in the alley and from the park area, which included 10  
141 trees growing in the neighbouring area, within the boundaries of the city park. Samples of soil  
142 were air-dried, passed through a mesh screen, and stored for further analysis. The soil  
143 analyses were performed in the laboratory of the Polish Centre for Accreditation (No.  
144 AB312). The accuracy of the analysis was checked against standard reference materials:  
145 international standard soils [31-34]. The phosphorus (P) was determined for all samples with  
146 1% citric acid extraction, according to Schlichting et al. [35]. The soil pH and was determined  
147 by mixing 20 ml of soil substrate with 40 ml of deionized water measured with a calibrated  
148 pH meter equipped with a glass electrode.

149

## 150 **Data analysis**

151

152 For the purpose of data analysis, the two mycorrhizal data subsamples were summed  
153 for each tree in order to match the number of soil samples. Hence, a total of 40 samples were  
154 analysed in the study. All soil characteristics which were measured below the limit of  
155 detection were substituted with the half value of the corresponding limit. In order to  
156 investigate the relation between the tree damage classes and the abundance of VM, NM, and  
157 NV root tips, the data were cross-tabulated into a contingency table and the chi-square test of  
158 independence was performed. The cells in the contingency table which were responsible for  
159 the significant departure from independence of the examined variables were identified as  
160 those for which the absolute maximum of Pearson's residual exceeded the value of 2.

161

162 The species diversity for each class of trees was estimated with the Chao1 and  
163 Shannon diversity indices. The differences in the characteristics of the soil samples between  
164 the tree classes were examined with the one-way analysis of variance (ANOVA) or the non-  
165 parametric Kruskal-Wallis test. The Kruskal-Wallis analysis was applied in the case of the  
166 soil parameters which did not fulfil the assumptions of the ANOVA: the homogeneity of  
167 variance (Levene's test) and/or normality (Shapiro-Wilk test). In the case of significant  
168 differences, Tukey's honestly significant difference (HSD) test (for ANOVA) and Dunn's test  
169 (for Kruskal-Wallis) were used to identify the homogeneous groups of tree classes. Spearman  
170 correlation and principal component analysis (PCA) were used to relate the soil characteristics  
with the abundance of VM, NM, and NV root tips. The Kaiser-Meyer-Olkin (KMO) measure

171 of sampling adequacy was applied to select the variables applicable for the PCA with the  
 172 KMO threshold value equal to 0.6. Bartlett's sphericity test was then used to confirm that the  
 173 set of selected variables is suitable for structure detection.

174

## 175 Results

176

177 The smallest degree of mycorrhization was observed in class R3 (18%). From  
 178 mycorrhizal root tips after regrouping and combining on the basis of the results of the  
 179 molecular analysis, finally 11 fungal taxa were detected and assigned to a species level (Table  
 180 1, Fig 1). The five ECM fungal species (*Tylospora asterophora* (Bonord.) Donk, *Inocybe*  
 181 *grammopodia* Malençon, *Inocybe pelargonium* Kühner, *Cenococcum geophilum* Fr., *Tuber*  
 182 *rufum* Picco) were shared among all four trees damage classes (Table 1). *Cenococcum*  
 183 *geophilum* was found to be the most abundant and frequent ECM fungal species among all  
 184 classes (Fig 2a). Moreover, *C. geophilum* was present in more than 60% of all ECM tips (Fig  
 185 2b). For each damage class, the species composition of ECM fungi, fungal species richness  
 186 and diversity indexes were analysed. The number of observed root tips decreased, from the  
 187 park trees, through the successive tree groups of increasing level of damage. Taxa richness  
 188 decreased similarly. The numbers of observed root tips in trees from the R0, R1, R2 and R3  
 189 groups were 5956, 4472, 3022 and 1163, and the numbers of species were 10, 8, 7 and 5,  
 190 respectively. For the individual trees, the numbers of observed root tips and the numbers of  
 191 species were highly correlated: Spearman correlation equal to 0.77 at p-value<0.0001. Due to  
 192 lack of singletons and doubletons observed in the analysed samples, the Chao1 index  
 193 computed for each tree class equalled the taxa richness.

194 Nearly half of the tested tip samples, 43%, were non-vital, while 20% and 37% of the  
 195 samples belonged to the NM and VM types (Table 1). The chi-square test showed that, in  
 196 comparison to this average distribution of the tip classes, the park trees showed a slight excess  
 197 of the VM type tips, street trees from the R1 group showed an excess of the NV and VM type  
 198 tips, and samples from the R3 trees had strong overrepresentation of the NV and NM tips and  
 199 underrepresentation of the VM class tips.

200

201 **Table 1. Estimated species richness, diversity and occurrence of fungal taxa associated with the roots of**  
 202 **linden trees.**

| Identification               | BLAST top-hit                |          |              | Park  |       | Street |       |       |       |       |       |
|------------------------------|------------------------------|----------|--------------|-------|-------|--------|-------|-------|-------|-------|-------|
|                              | Closest match                | NCBI     | Identity [%] | R0    |       | R1     |       | R2    |       | R3    |       |
|                              |                              |          |              | Freq. | Abun. | Freq.  | Abun. | Freq. | Abun. | Freq. | Abun. |
| <b>Basidiomycota</b>         |                              |          |              |       |       |        |       |       |       |       |       |
| <i>Tylospora asterophora</i> | <i>Tylospora asterophora</i> | -        | 97           | 60    | 4.8   | 91     | 5.8   | 20    | 6.0   | 56    | 2.8   |
| <i>Inocybe maculata</i>      | <i>Inocybe maculata</i>      | MT431581 | 99           | 50    | 1.3   | 36     | 4.6   | 10    | 0.2   | -     | -     |
| <i>Inocybe grammopodia</i>   | <i>Inocybe grammopodia</i>   | MT431580 | 97           | 40    | 0.6   | 27     | 0.7   | 10    | 0.7   | 22    | 0.6   |
| <i>Inocybe pelargonium</i>   | <i>Inocybe pelargonium</i>   | MT431583 | 97           | 20    | 0.3   | 36     | 0.7   | 30    | 1.8   | 11    | 0.7   |
| <i>Inocybe cincinnata</i>    | <i>Inocybe cincinnata</i>    | -        | 97           | 30    | 0.5   | -      | -     | -     | -     | -     | -     |

|                                                            |                               |          |      |             |              |             |      |             |              |             |     |
|------------------------------------------------------------|-------------------------------|----------|------|-------------|--------------|-------------|------|-------------|--------------|-------------|-----|
| <i>Inocybe manukanea</i>                                   | <i>Inocybe manukanea</i>      | MT431582 | 97   | 20          | 1.0          | -           | -    | -           | -            | -           | -   |
| <i>Hebeloma sacchariolens</i>                              | <i>Hebeloma sacchariolens</i> | MT431579 | 97   | 10          | 0.3          | -           | -    | -           | -            | -           | -   |
| <i>Sebacina cystidiata</i>                                 | <i>Sebacina cystidiata</i>    | MT431584 | 97   | -           | -            | 18          | 3.3  | -           | -            | -           | -   |
| <b>Ascomycota</b>                                          |                               |          |      |             |              |             |      |             |              |             |     |
| <i>Cenococcum geophilum</i>                                | <i>Cenococcum geophilum</i>   | MT431587 | 99   | 90          | 17.7         | 82          | 16.2 | 90          | 24.7         | 67          | 9.3 |
| <i>Tuber rufum</i>                                         | <i>Tuber rufum</i>            | MT431586 | 97   | 70          | 9.4          | 36          | 1.9  | 60          | 2.5          | 33          | 4.0 |
| <i>Tuber borchii</i>                                       | <i>Tuber borchii</i>          | MT431585 | 97   | 60          | 4.0          | 45          | 7.2  | 40          | 1.2          | -           | -   |
| Mycorrhizal fungal species richness [n]                    |                               |          |      | 10          |              | 8           |      | 7           |              | 5           |     |
| Degree of mycorrhization [%]                               |                               |          |      | 39.7        |              | 40.4        |      | 40.0        |              | 17.3        |     |
| <b>Chi-square test of independence (p-value&lt;0.0001)</b> |                               |          | Mean |             |              |             |      |             |              |             |     |
| NV                                                         |                               |          | 43%  | 41%         | <b>40%*</b>  |             | 44%  |             | <b>52%**</b> |             |     |
| NM                                                         |                               |          | 20%  | 19%         | 19%          |             | 19%  |             | <b>30%**</b> |             |     |
| VM                                                         |                               |          | 37%  | <b>40%*</b> | <b>41%**</b> |             | 37%  |             | <b>18%**</b> |             |     |
| Sum                                                        |                               |          | 100% | 100%        | 100%         |             | 100% |             | 100%         |             |     |
| <b>Estimated species richness</b>                          |                               |          |      |             |              |             |      |             |              |             |     |
| Chao-1                                                     |                               |          |      | 10          |              | 8           |      | 7           |              | 5           |     |
| <b>Diversity</b>                                           |                               |          |      |             |              |             |      |             |              |             |     |
| Shannon diversity index (H') - for combined samples        |                               |          |      | 1.57        |              | 1.69        |      | 1.10        |              | 1.21        |     |
| Shannon diversity index (H'), mean of individual samples   |                               |          |      | 0.90 ± 0.50 |              | 0.76 ± 0.38 |      | 0.56 ± 0.36 |              | 0.39 ± 0.45 |     |

203 Data are the frequency (Freq.; percent of colonized plants) and abundance (Abun.; percent of mycorrhizal roots  
 204 colonized) of fungal taxa on root tips. The contingency table for the tree class vs the abundance of VM, NM, and  
 205 NV root tips is presented, with percentage of each tree class samples for a given type of root tips. The cells  
 206 responsible for the significant departure from independence of the examined variables indicated with bold fonts.  
 207 The significant difference was found with ANOVA between the values of the Shannon index at the p-  
 208 value=0.063. Pearson residuals analysis: \* - residuals exceeding 2, \*\* - residuals exceeding 3

209  
 210 **Fig 1. Ectomycorrhizas observed on linden trees in the Gdańsk.** (a) *Cenococcum geophilum* Fr., (b)  
 211 *Hebeloma sacchariolens* Quél., (c) *Inocybe cincinnata* (Fr.) Quél., (d) *Inocybe grammopodia* Malençon, (e)  
 212 *Inocybe maculata* Boud., (f) *Inocybe manukanea* (E. Horak) Garrido, (g) *Inocybe pelargonium* Kühner, (h)  
 213 *Sebacina cystidiata* Oberw., Garnica & K. Riess., (i) *Tuber borchii* Vittad., (j) *Tuber rufum* Pollini, (k, l)  
 214 *Tylospora asterophora* (Bonord.) Donk. Bars in each photograph indicate 0.4 mm length.

215  
 216 **Fig 2a. The abundance of the observed ECM fungi species in different damage classes.** Each colour  
 217 represents the number of the root tips with the observed fungi species.

218 **Fig 2b. The percentage of the observed ECM fungi species in different damage classes.** Each colour  
 219 represents the number of the root tips with the observed fungi species.

220  
 221 Mean values of the soil parameters between classes are reported in Table 2. In the case  
 222 of 6 soil characteristics, out of 16 examined, significant differences were found. These  
 223 parameters were Cl, Na, Pb, Ca and Fe contents and the soil pH. Park soil had significantly  
 224 lower pH and Na, Cl and Pb content than street soils. Considerable differences were observed  
 225 between the content of Ca and Fe. In the first case, there was a significant difference only  
 226 between the trees from the R0 and R3 damage classes, with the park trees having the lowest  
 227 Ca content. In the case of Fe, there was a significant difference between the trees from the R0,  
 228 R1 and R3 damage classes, with the park trees having the highest Fe amount. Also, in this  
 229 case the average Fe content in the samples from the R2 tree class was much lower than in the

230 case of the park trees, but no significant differences were reported due to large variability of  
 231 the R2 samples. In some cases (Cr for example), though the differences between means seem  
 232 large, no significant differences were found due to high variability of the data, especially  
 233 among the R2 tree class samples.

234 Only some of the examined soil parameters were related to the abundance of the root  
 235 tips and degree of mycorrhizal colonisation (Table 2). As can be seen, increase of three soil  
 236 parameters, N-NO<sub>3</sub>, N-NH<sub>4</sub> and K, leads to an increase of the number of root tips. All the  
 237 remaining soil features negatively influence the abundance of the root tips and the relative  
 238 abundance of the mycorrhizal root tips (VM).

239

240 **Table 2. Mean values of selected physical and chemical properties of soil in samples associated with the**  
 241 **trees of different damage classes.**

|                          | Park          |          | Street        |           |               |                | Spearman correlation |          |       |       |
|--------------------------|---------------|----------|---------------|-----------|---------------|----------------|----------------------|----------|-------|-------|
|                          | R0            | R1       | R1            | R2        | R3            | # of root tips | VM                   |          |       |       |
| <b>pHH<sub>2</sub>O</b>  | <b>6.9</b>    | <b>b</b> | <b>7.6</b>    | <b>a</b>  | <b>7.8</b>    | <b>a</b>       | <b>7.9</b>           | <b>a</b> | -0.55 | -0.45 |
| <b>Na (mg/l)</b>         | <b>27.1</b>   | <b>b</b> | <b>132.3</b>  | <b>a</b>  | <b>352.3</b>  | <b>a</b>       | <b>290.0</b>         | <b>a</b> | -0.6  | -0.49 |
| <b>Cl (mg/l)</b>         | <b>20.0</b>   | <b>b</b> | <b>34.5</b>   | <b>a</b>  | <b>95.2</b>   | <b>a</b>       | <b>56.4</b>          | <b>a</b> | -0.55 | -0.43 |
| <b>Pb (mg/kg)</b>        | <b>55.9</b>   | <b>b</b> | <b>115.2</b>  | <b>a</b>  | <b>145.6</b>  | <b>a</b>       | <b>129.0</b>         | <b>a</b> | -0.35 | -0.48 |
| <b>Ca (mg/l)</b>         | <b>1220.3</b> | <b>b</b> | <b>1736.7</b> | <b>ab</b> | <b>1523.6</b> | <b>ab</b>      | <b>1853.7</b>        | <b>a</b> |       | -0.34 |
| <b>Fe (mg/l)</b>         | <b>96.3</b>   | <b>a</b> | <b>63.0</b>   | <b>b</b>  | <b>62.6</b>   | <b>ab</b>      | <b>58.9</b>          | <b>b</b> |       |       |
| N-NO <sub>3</sub> (mg/l) | 29.4          |          | 23.2          |           | 22.9          |                | 22.3                 |          | 0.45  |       |
| C-org (%)                | 2.8           |          | 2.6           |           | 2.9           |                | 2.5                  |          |       |       |
| Cr (mg/kg)               | 17.0          |          | 24.3          |           | 51.6          |                | 37.2                 |          |       |       |
| Cu (mg/l)                | 7.0           |          | 9.3           |           | 11.5          |                | 13.7                 |          | -0.40 | -0.45 |
| Zn (mg/l)                | 27.1          |          | 37.2          |           | 43.5          |                | 32.1                 |          |       | -0.35 |
| K (mg/l)                 | 151.1         |          | 153.8         |           | 115.3         |                | 100.0                |          | 0.4   |       |
| Mg (mg/l)                | 122.7         |          | 130.7         |           | 99.4          |                | 104.4                |          |       |       |
| N-NH <sub>4</sub> (mg/l) | 11.3          |          | 11.0          |           | 10.0          |                | 6.9                  |          | 0.32  |       |
| P (mg/l)                 | 67.9          |          | 53.0          |           | 53.9          |                | 39.9                 |          |       |       |
| Mn (mg/l)                | 2.0           |          | 2.2           |           | 2.6           |                | 2.7                  |          |       |       |

242 The soil features significantly different, at p-value<0.05, among the tree groups indicated in bold font. Different  
 243 letters indicate significant differences. Significant, at p-value<0.05, Spearman correlation of soil parameters and  
 244 the abundance of the root tips and degree of mycorrhizal colonisation.

245

246 The overall high variability of the soil characteristics in the samples related to the  
 247 individual trees can be seen in the PCA plot in Fig 3. Correlation of the examined soil  
 248 parameters allowed two main groups of them to be distinguished. The first group contains C-  
 249 org, Cl, Cr, Cu, Na, Pb and Zn, and the second contains K, Mg and N-NH<sub>4</sub>. All members of  
 250 the second group were negatively related to some representatives of the first one, namely Cu,  
 251 Cr, Na and Pb. The parameter which links the two groups was pHH<sub>2</sub>O, positively correlated  
 252 with Cu, Cr, Na and Pb and negatively with N-NH<sub>4</sub>. In the case of the park trees, the samples  
 253 are distributed parallel to the second group of soil parameters – Mg, K and N-NH<sub>4</sub> – and in  
 254 the case of the street trees, the high variability. The remaining soil features, Ca, Fe, P and N-

255 NO<sub>3</sub>, had a weaker correlation with other parameters and Mn showed no relation to any  
256 parameter.

257  
258 **Fig 3. PCA plot representing the relationship between soil parameters studied and their links with classes**  
259 **of trees.** The ellipses are the 95% probability confidence ellipses around the mean point of each tree class.

260

## 261 Discussion

262

263 The study presented here investigated the relationships among the health status of  
264 urban linden trees using Roloff's classification with ECM communities. So far, few studies  
265 have dealt with the ECM community in urban linden trees [22,36,37,38]. Considering the  
266 mycorrhization degree, only class R3 had significantly fewer vital ectomycorrhizal tips than  
267 other classes. These data confirmed the data obtained by studying the English oak trees [39],  
268 where fine roots of most declining trees had a lower proportion of vital and ectomycorrhizal  
269 tips.

270 The *Tilia* species analysed in our study belong to Great Linden Avenue, which is  
271 subject to legal protection. Our study showed that the ECM community structure is highly  
272 dependent on the level of decline of the linden trees. The observed ECM fungal species  
273 diversity differed significantly along the tree vitality. A similar study conducted in Italy,  
274 comparing the health situation of linden trees, classified as 'moderately declining' and  
275 'strongly declining', showed that the number of ECM fungal species was lower in this second  
276 group in comparison to the first [36]. Since lack of nutrients, attack from pathogens, drought  
277 and use of de-icing salts are among the main causes of damage of urban trees [40], ECM  
278 fungi of urban trees may enhance their growth and survival in the urban environment. In our  
279 study the street trees were already 60 years old and the mycorrhizal fungal population  
280 associated with their roots was likely to be well adjusted to the street habitat. *Tilia* roots in the  
281 park site harboured a diversity of ectomycorrhizal fungi. The number of 10 mycorrhizal  
282 morphotypes found in the park in this study was similar to the 12–13 morphotypes observed  
283 by Nielsen and Rasmussen [41] in native and planted forests in Denmark. The higher  
284 diversity of ectomycorrhizal fungi in the park may be the result of low soil pH in park soils  
285 and also partly due to the higher diversity of other ectomycorrhizal plants surrounding the  
286 *Tilia* trees in this habitat than in the 'street' habitat.

287 As hypothesized, a gradual increase in taxa richness was observed from the highest  
288 damage of trees (R3: 5 taxa) to the best health condition of trees (R0: 10 taxa). The  
289 differences among the ECM fungal communities harboured by linden trees on the studied  
290 sites may be affected by salinity and concentration of heavy metals. The salt applied to roads  
291 in winter is a serious cause of damage of urban trees [42], including water deficit, soil  
292 compaction, ion toxicity and ion imbalance [43,44]. Moreover, Na and Cl may inhibit  
293 enzymatic activity of fungi [45]. In our study the elevated amount of Na and Cl was the soil  
294 feature unique to the street when compared with the park habitat. The soil microbial  
295 communities are affected more by salinity than by extremes of any other abiotic factor [46],  
296 so this factor could have affected the lower species composition of the ECM fungi associated  
297 with the linden street trees.



298 The PCA analysis showed a gradual shift in similarity between the adjacent damage  
299 classes (Fig 3). In part, these differences were due to a significantly higher concentration of  
300 heavy metals (Pb, Cr and Cu) in street soil. Moreover, in our study the concentration of Pb in  
301 street soil was significantly higher in comparison to park soil. In general, increased  
302 concentrations of heavy metals in the soil are known to negatively affect biodiversity [e.g.  
303 47,48]. Heavy metals damage proteins, lipids and DNA [49]. Turpeinen, Kairesalo and  
304 Haggblom [50], who investigated the impact of heavy metal contamination on microbial  
305 communities, found a negative effect of metal pollution on fungal diversity. This is consistent  
306 with the findings in our study, where the street site was shown to host a lower ECM fungal  
307 richness than the park site. On the other hand, van Geel et al. [37] reported that the variability  
308 in ECM communities of *T. tomentosum* urban trees was little attributed by heavy metal  
309 pollution. It is important to note that Van Geel et al. [37] used high-throughput sequencing  
310 (HTS) as the basis of taxa identification and the results featured only mycorrhizae identified  
311 at the family level. Another point when comparing those results is the different sampling area  
312 included in the studies. The study of van Geel et al. [37] was performed on a relatively large  
313 scale, due to its location in three European cities. In our study we concentrated on one city  
314 and one street, which limited the potential for replication. More research is needed on a larger  
315 sample to reliably identify the reasons for the differences observed between our results and  
316 previous research.

317 Surprisingly, we also found several ECM that were common to all damage classes.  
318 There were genera belonging to early-stage fungi, including *I. grammopodia* and *I.*  
319 *pelargonium*. These fungi are often found in habitats with limited nutrient availability [51],  
320 for instance in urban ecosystems. Although *T. rufum* needs a more stable habitat [52], this  
321 fungus was abundantly present in all damage classes. It may have resulted from the alkaline  
322 conditions in street soil, because Tubercaceae generally prefer more alkaline conditions [53].  
323 This result may also suggest that some genotypes are either adapted to street conditions or  
324 they are not outcompeted.

325 The ECM fungal species that we found to be predominant – *C. geophilum* – was  
326 present among all damage classes. The dominance of *C. geophilum* was not a surprising  
327 result, because this fungus is known as the most efficient drought-tolerant type [12,54].  
328 Considering the ECM community composition related to plant health status, Timonen and  
329 Kauppinen [22] demonstrated that *Cenococcum* spp. were more dominant in the roots of  
330 unhealthy street trees. This fungus forms ECM with many tree species because of its  
331 pioneering capabilities and persistence of sclerotia in the soil [55]. Due to its active growth at  
332 low soil temperature and drought tolerance [12] it is well known for its extremely wide  
333 habitat range and for being competitive under adverse climate conditions. In the case of our  
334 study, abundant root colonization by *C. geophilum* may also be the result of competition for  
335 water resources. This interpretation, however, is made cautiously because the ECM  
336 community of urban trees in water stress has not been studied. *Hebeloma sachariolens* was  
337 found only in park soil conditions where content of N and P was higher than in street soils,  
338 which is in agreement with the findings of many authors [56-59] regarding the ability of this  
339 fungus species to tolerate rather high nutrient conditions. The formation of mycorrhizae by *T.*  
340 *borchii* and *T. maculatum* is hardly surprising as the fungi have been reported to form  
341 mycorrhizal symbioses with *Tilia* spp. elsewhere in Europe [60,61].

342 Overall, our results showed that the tree vitality was significantly associated with soil  
343 characteristics, especially with heavy metal pollution. Our knowledge of ECM communities  
344 in urban areas is still limited, and these findings provide new insights into ECM distribution  
345 patterns in urban ecosystems. Given the multifunctional role of ECM in urban ecosystems,  
346 further research should also include manipulation of mycorrhizal communities in the field.  
347

## 348 **Acknowledgements**

349  
350 We would like to thank the City Hall of Gdańsk and Road and Greenery Department  
351 of Gdańsk for founding of the data concerning the inventory of the Great Lime Avenue,  
352 which were the basis of the analyses carried out in this paper.  
353

## 354 **Author Contributions**

355

## 356 **References**

357

- 358 1. Seto KC, Guneralp B, Hutyra LR. Global forecasts of urban expansion to 2030 and  
359 direct impacts on biodiversity and carbon pools. *PNAS*. 2012;109: 16083–8.
- 360 2. Sudipto R. Anomalies in Australian municipal tree managers' street-tree planting and  
361 species selection principles. *Urban For Urban Green*. 2017;24: 125–133.
- 362 3. Sæbø A, Benedikt T, Randrup TB. Selection of trees for urban forestry in the Nordic  
363 countries. *Urban For Urban Green*. 2003;2: 101–114.
- 364 4. Roman LA, Scatena FN. Street tree survival rates: Meta-analysis of previous studies  
365 and application to a field survey in Philadelphia, PA, USA. *Urban For Urban Green*.  
366 2011;10: 269–274.
- 367 5. Pauleit S, Jones N, Garcia-Martin G, Garcia-Valdecantos JL, Rive`re LM, Vidal-  
368 Beaudet L, Bodson M, Randrup TB. Tree establishment practice in towns and cities—  
369 results from a European survey. *Urban For Urban Green*. 2002;1: 83–96.
- 370 6. Dmuchowski W, Badurek M. Condition of streetside greenery in Warsaw based on  
371 many years of observation and experiments by the Botanical Garden CZRB PAN  
372 Materials from The Science and technology Conference Warsaw, Greenery Problems  
373 and Hopes – 5 Years Later, Warsaw, 4.10.201: pp.19-31, 2001 [In Polish].
- 374 7. Dmuchowski W, Baczewska A, Brągoszewska P. Reaction of street trees to adverse  
375 environmental conditions in the centre of Warsaw. *Ecol Quest*. 2011;15(1): 97-105.
- 376 8. Pedersen LB, Randrup TB, Ingerslev M. Effects of road distance and protective  
377 measures on deicing NaCl deposition and soil chemistry in planted median strips.  
378 *Arboric J*. 2000;26: 238-245.
- 379 9. Percival GC, Keary IP, Sulaiman AH. An assessment of the drought tolerance of  
380 *Fraxinus* genotypes for urban landscape plantings. *Urban For Urban Green*. 2006;5:  
381 17–27.
- 382 10. Jim CY. Physical and chemical properties of a Hong Kong roadside soil in relation to  
383 urban tree growth. *Urban Ecosyst*. 1998;2: 171–181.

- 384 11. Pouyat RV, Yesilonis ID, Russell-Anelli J, Neerchal NK. Soil chemical and physical  
385 properties that differentiate urban land-use and cover types. *Soil Sci Soc Am J.*  
386 2007;71(3): 1010-1019.
- 387 12. Pigott CD. Survival of mycorrhiza formed by *Cenococcum geophilum* fr. in dry soils.  
388 *New Phytol.* 1982;92(4): 513–517.
- 389 13. Impa SM, Nadaradjan S, Jagadish SVK. Drought stress induced reactive oxygen  
390 species and anti-oxidants in plants. In: Ahmad P, Prasad M, editors. *Abiotic stress*  
391 *responses in plants: metabolism, productivity and sustainability.* New York: Springer;  
392 2012. pp. 131–147.
- 393 14. Hasanuzzaman M, Gill SS, Fujita M. Physiological role of nitric oxide in plants grown  
394 under adverse environmental conditions. In: Tuteja N, Gill SS, editors. *Plant*  
395 *acclimation to environmental stress.* New York: Springer; 2013. pp. 269–322.
- 396 15. Ahanger MA, Agarwal RM. Potassium up-regulates antioxidant metabolism and  
397 alleviates growth inhibition under water and osmotic stress in wheat (*Triticum*  
398 *aestivum* L.). *Protoplasma.* 2017;254(4): 1471–1486.
- 399 16. Ahanger MA, Tomar NS, Tittal M, Argal S, Agarwal RM. Plant growth under  
400 water/salt stress: ROS production; antioxidants and significance of added potassium  
401 under such conditions. *Physiol Mol Biol Plants.* 2017;23(4): 731–744.
- 402 17. Dobbertin M. Tree Growth as Indicator of Tree Vitality and of Tree Reaction to  
403 Environmental Stress: A Review. *Eur.J For Res.* 2005;124: 319-333.
- 404 18. Smith SE, Read DJ. *Mycorrhizal Symbiosis.* London: Academic Press; 2008.
- 405 19. Allen MF, Swenson W, Querejeta JI, Egerton-Warburton LM, Treseder KK. Ecology  
406 of mycorrhizae: a conceptual framework for complex interactions among plants and  
407 fungi. *Annu. Rev. Phytopathol.* 2003;41: 271–303.
- 408 20. Guescini M, Pierleoni R, Palma F, Zeppa S, Vallorani L, Potenza L, Sacconi C,  
409 Giomaro G, Stocchi V. Characterization of the *Tuber borchii* nitrate reductase gene  
410 and its role in ectomycorrhizae. *Mol Genet Genomic Med.* 2003;269: 807–816.
- 411 21. Mancuso S, Rinaldelli R. Response of young mycorrhizal and non-mycorrhizal plants  
412 of olive tree (*Olea europaea* L.) to saline conditions. II. Dynamics of electrical  
413 impedance parameters of shoots and leaves. *Adv Hort Sci.* 1996;10: 135-145.
- 414 22. Timonen S, Kauppinen P. Mycorrhizal colonisation patterns of *Tilia* trees in street,  
415 nursery and forest habitats in southern Finland. *Urban For Urban Green.* 2008;7: 265–  
416 276.
- 417 23. Tyburska J, Frymark-Szymkowiak A, Kulczyk-Skrzeszewska M, Kieliszewska-  
418 Rokicka B. Mycorrhizal status of forest trees grown in urban and rural environments  
419 in Poland. *Ecol Quest.* 2013;18: 49–57.
- 420 24. Roloff A. *Handbuch Baumdiagnostik Baum-Korpersprache und Baum-Beurteilung.*  
421 Stuttgart: Ulmer Verlag; 2015.
- 422 25. Agerer R. Characterization of ectomycorrhizae. In: Norris JR, Read DJ, Varma AK,  
423 editors. *Methods in microbiology: techniques for the study of mycorrhiza;* London:  
424 Academic Press; 1991. pp. 25-73.
- 425 26. Agerer R. *Colour Atlas of Ectomycorrhizae.* 1st ed. Munich: Einhorn-Verlag; 1987–  
426 2008.

- 427 27. Olchowik J, Hilszczańska D, Bzdyk RM, Studnicki M, Malewski T, Borowski Z.  
428 Effect of deadwood on ectomycorrhizal colonisation of old-growth oak forests.  
429 Forests. 2019;10(6): 480.
- 430 28. White TJ, Bruns T, Lee S, Taylor J. Amplification and direct sequencing of fungal  
431 ribosomal RNA genes for phylogenetics. In: Innis MA, Gelfand DH, Sninsky JJ,  
432 White TJ, editors. PCR Protocols: A Guide to Methods and Applications; New York:  
433 Academic Press; 1990. pp. 315–322.
- 434 29. Gardes M, Bruns TD. ITS primers with enhanced specificity for basidiomycetes -  
435 application to the identification of mycorrhizae and rusts. Mol Ecol. 1993;2(2): 113–  
436 118.
- 437 30. Olchowik J, Bzdyk R, Studnicki M, Bednarska-Błaszczuk M, Urban A,  
438 Aleksandrowicz-Trzcńska M. The effects of silver and copper nanoparticles on the  
439 condition of English oak (*Quercus robur* L.) seedlings in a container nursery  
440 experiment. Forests. 2017;8: 310.
- 441 31. ISO 13878. Soil Quality. Determination of Total Nitrogen Content by Dry  
442 Combustion (“Elemental Analysis”); International Organization for Standardization:  
443 Geneva, Switzerland, 2002.
- 444 32. ISO 10694. Soil Quality. Determination of Organic and Total Carbon after Dry  
445 Combustion (“Elementary Analysis”); International Organization for Standardization:  
446 Geneva, Switzerland, 2002.
- 447 33. ISO 11260. Soil Quality. Determination of Effective Cation Exchange Capacity and  
448 Base Saturation Level Using Barium Chloride Solution; International Organization for  
449 Standardization: Geneva, Switzerland, 2011.
- 450 34. ISO 10390. Soil Quality. Determination of pH; International Organization for  
451 Standardization: Geneva, Switzerland, 1997.
- 452 35. Schlichting E, Blume HP, Stahr K. Bodenkundliches Praktikum. Berlin: Blackwell  
453 Wissenschafts-Verlag; 1995.
- 454 36. Alzetta C, Claudia L, et al. The ectomycorrhizal community in urban linden trees and  
455 its relationship with soil properties. Trees, 2012;26.(3): 751-767.
- 456 37. Van Geel M, Yu K, Ceulemans T, Peeters G, Acker K, Geerts W, et al. Variation in  
457 ectomycorrhizal fungal communities associated with Silver linden (*Tilia tomentosa*)  
458 within and across urban areas. FEMS Microbiol. Ecol. 2018;94:12; 1-11.
- 459 38. Van Geel M, Yu K, Peeters G, van Acker K, Ramos M, Serafim C, et al. Soil organic  
460 matter rather than ectomycorrhizal diversity is related to urban tree health. PLoS ONE,  
461 2019;14(11): e0225714.
- 462 39. Bzdyk RM, Olchowik J, Studnicki M, Nowakowska JA, Oszako T, Urban A,  
463 Hilszczańska D. Ectomycorrhizal colonisation in declining oak stands on the  
464 Krotoszyn Plateau, Poland. Forests. 2019;10: 30.
- 465 40. Fini A, Ferrini F. Influenza dell’ambiente urbano sulla fisiologia e la crescita degli  
466 alberi. Italus Hortus. 2007;14(1): 9-24. Italian.
- 467 41. Nielsen JS, Rasmussen HN. Mycorrhizal status and morphotype diversity in *Tilia*  
468 *cordata* – a pilot study of nurseries and urban habitats. Acta Hort. 1999;496: 451-  
469 459.

- 470 42. Dobson, M.C. (1991). Diagnosis of de-icing salt damage to trees. Arboricultural  
471 Research Note 96/91/PATH. Forestry Commission.
- 472 43. Maas EV. Salt tolerance of plants. J Appl Agric Res. 1986;1: 12–26.
- 473 44. Marschner H. Mineral nutrition of higher plants. London: Academic Press; 1986.
- 474 45. Blomberg A, Adler L. Tolerance of fungi to NaCl. Mycology series. 1993.
- 475 46. Lozupone CA, Knight R. Global patterns in bacterial diversity. PNAS.  
476 2007;104(27):11436–11440.
- 477 47. Sandaa RA, Torsvik V, Enger O, et al. Analysis of bacterial communities in heavy  
478 metal-contaminated soils at different levels of resolution. FEMS Microbiol  
479 Ecol.1999;30: 237–51.
- 480 48. Gans J, Wolinsky M, Dunbar J. Computational improvements reveal great bacterial  
481 diversity and high metal toxicity in soil. Science. 2005;309: 1387–90.
- 482 49. Jiang W, Liu D. Pb.-induced cellular defense system in the root meristematic cells of  
483 *Allium sativum* L. BMC Plant Biol. 2010;10(1): 40.
- 484 50. Turpeinen R, Kairesalo T, Häggblom MM. Microbial community structure and  
485 activity in arsenic-, chromium- and copper-contaminated soils. FEMS Microbiol Ecol.  
486 2004;47(1): 39-50.
- 487 51. Newton AC. Towards a functional classification of ectomycorrhizal fungi.  
488 Mycorrhiza. 1992;2: 75–9.
- 489 52. Twieg BD, Durall DM, Simard SW. Ectomycorrhizal fungal succession in mixed  
490 temperate forests. New Phytologist. 2007;176: 437–47.
- 491 53. Rineau F, Maurice JP, Nys C, Voiry H, Garbaye J. Forest liming durably impact the  
492 communities of ectomycorrhizas and fungal epigeous fruiting bodies. Ann For Sci.  
493 2010;67: 1–12.
- 494 54. Jany JL, Martin F, Garbaye J. Respiration activity of ectomycorrhizas from  
495 *Cenococcum geophilum* and *Lactarius* sp. N relation to soil water potential in five  
496 beech forests. Plant Soil, 2003;255: 487–494.
- 497 55. Chambers SM, Cairney JWG. Pisolithus. J.W.G. Cairney, S.M. Chambers, editors.  
498 Ectomycorrhizal Fungi – Key genera in profile: Springer-Verlag, Germany; 1999. pp.  
499 1-31.
- 500 56. Mortier F, Tacon FL, Garbaye J. Effect of dose and formulation of *Laccaria laccata*  
501 inoculum on mycorrhizal infection and growth of Douglas fir in a nursery.  
502 Agriculture, Ecosystems & Environment. 1990; 28(1-4): 351 – 354.
- 503 57. Khasa PD, Sigler L, Chakravarty P, Dancik BP, Erickson L, McCurdy D Effect of  
504 fertilization on growth and ectomycorrhizal development of container-grown and bare-  
505 root nursery conifer seedlings. New Forests 2001;22: 179-197.
- 506 58. Rudawska M, Leski T, Trocha LK, Gornowicz R Ectomycorrhizal status spruce  
507 seedlings from bare-root forest nurseries. For Ecol Manage. 2006;236: 375–384.
- 508 59. Rincón A, de Felipe MR, Fernández-Pascual M. Inoculation of *Pinus halepensis* Mill.  
509 with selected ectomycorrhizal fungi improves seedling establishment 2 years after  
510 planting in a degraded gypsum soil. Mycorrhiza. 2007;18(1): 23-32.
- 511 60. Pigott CD. Biological flora of the British Isles. *Tilia cordata* miller. J Ecol. 1991;79:  
512 1147–1207.

- 513 61. Urbanelli S, Sallicandro P, De Vito E, Bullini L, Palenzona M. Ferrara AM.  
514 Identification of Tuber mycorrhizae using multilocus electrophoresis. *Mycologia*.  
515 1998;90(3): 389-395.

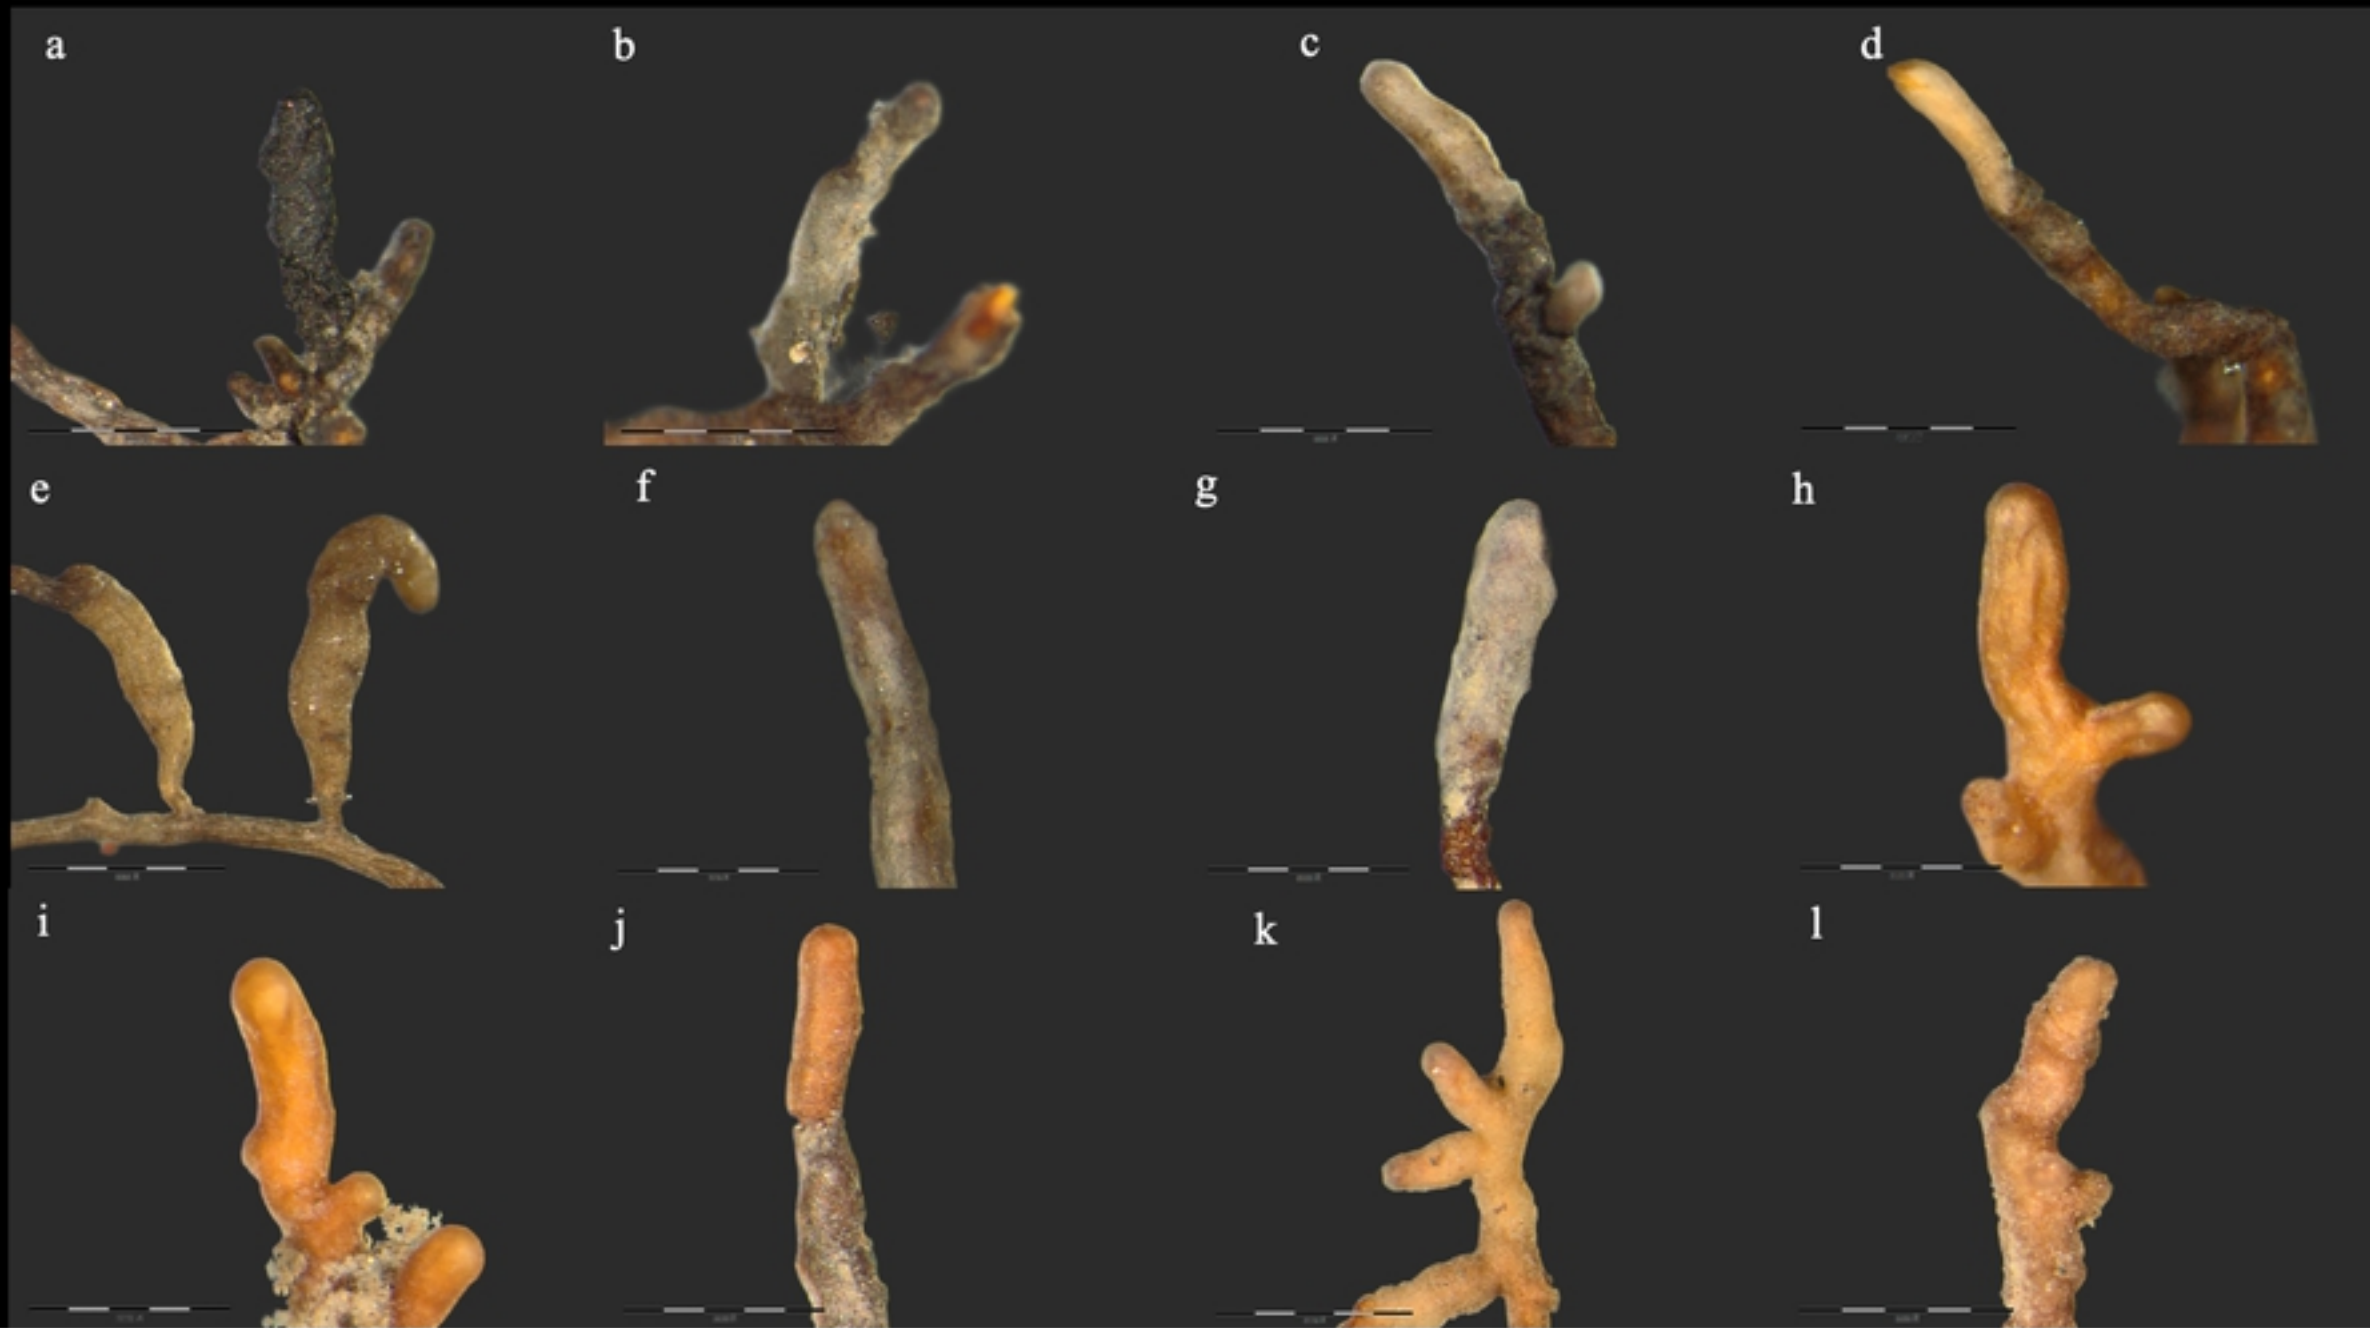

Figure 1

**a**

bioRxiv preprint doi: <https://doi.org/10.1101/2020.07.30.228668>; this version posted July 30, 2020. The copyright holder for this preprint (which was not certified by peer review) is the author/funder, who has granted bioRxiv a license to display the preprint in perpetuity. It is made available under aCC-BY 4.0 International license.

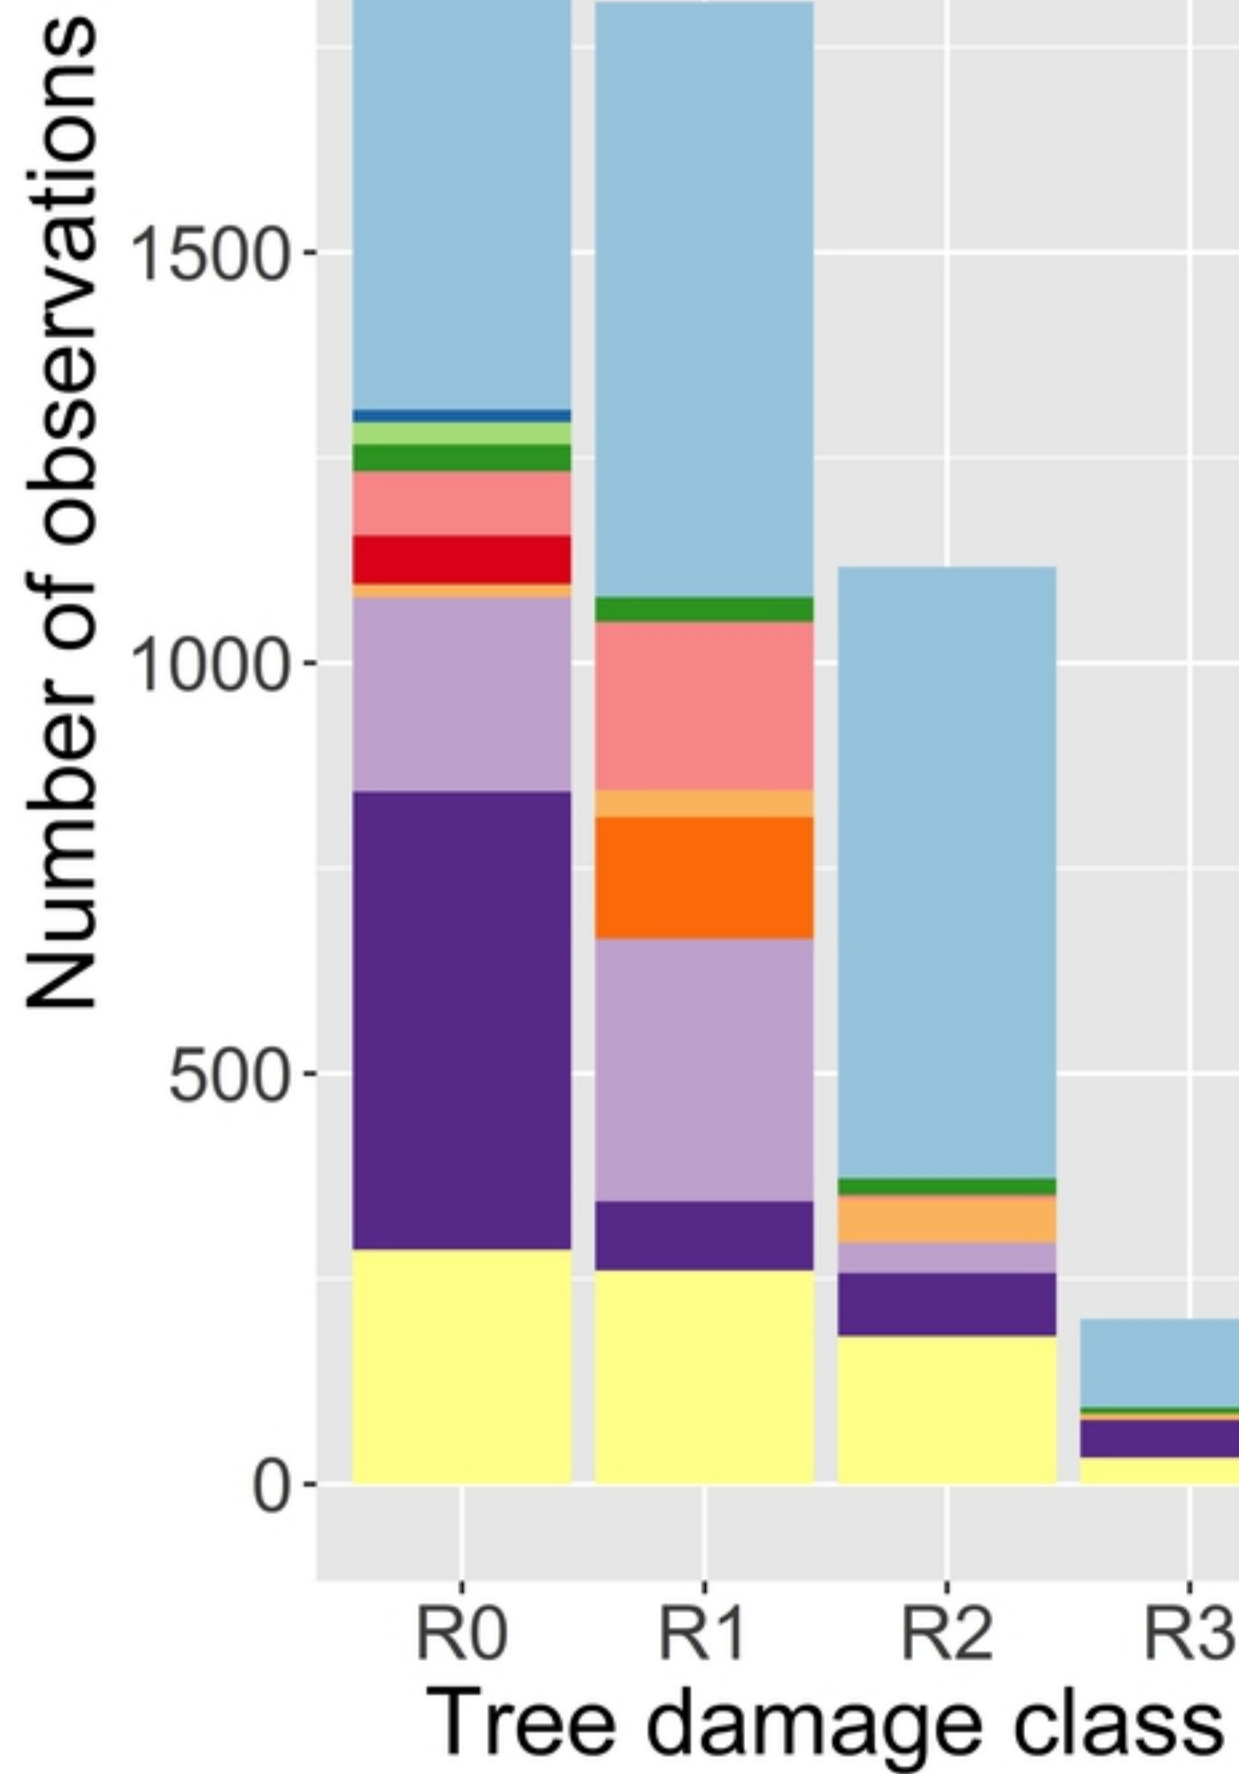

Figure2a



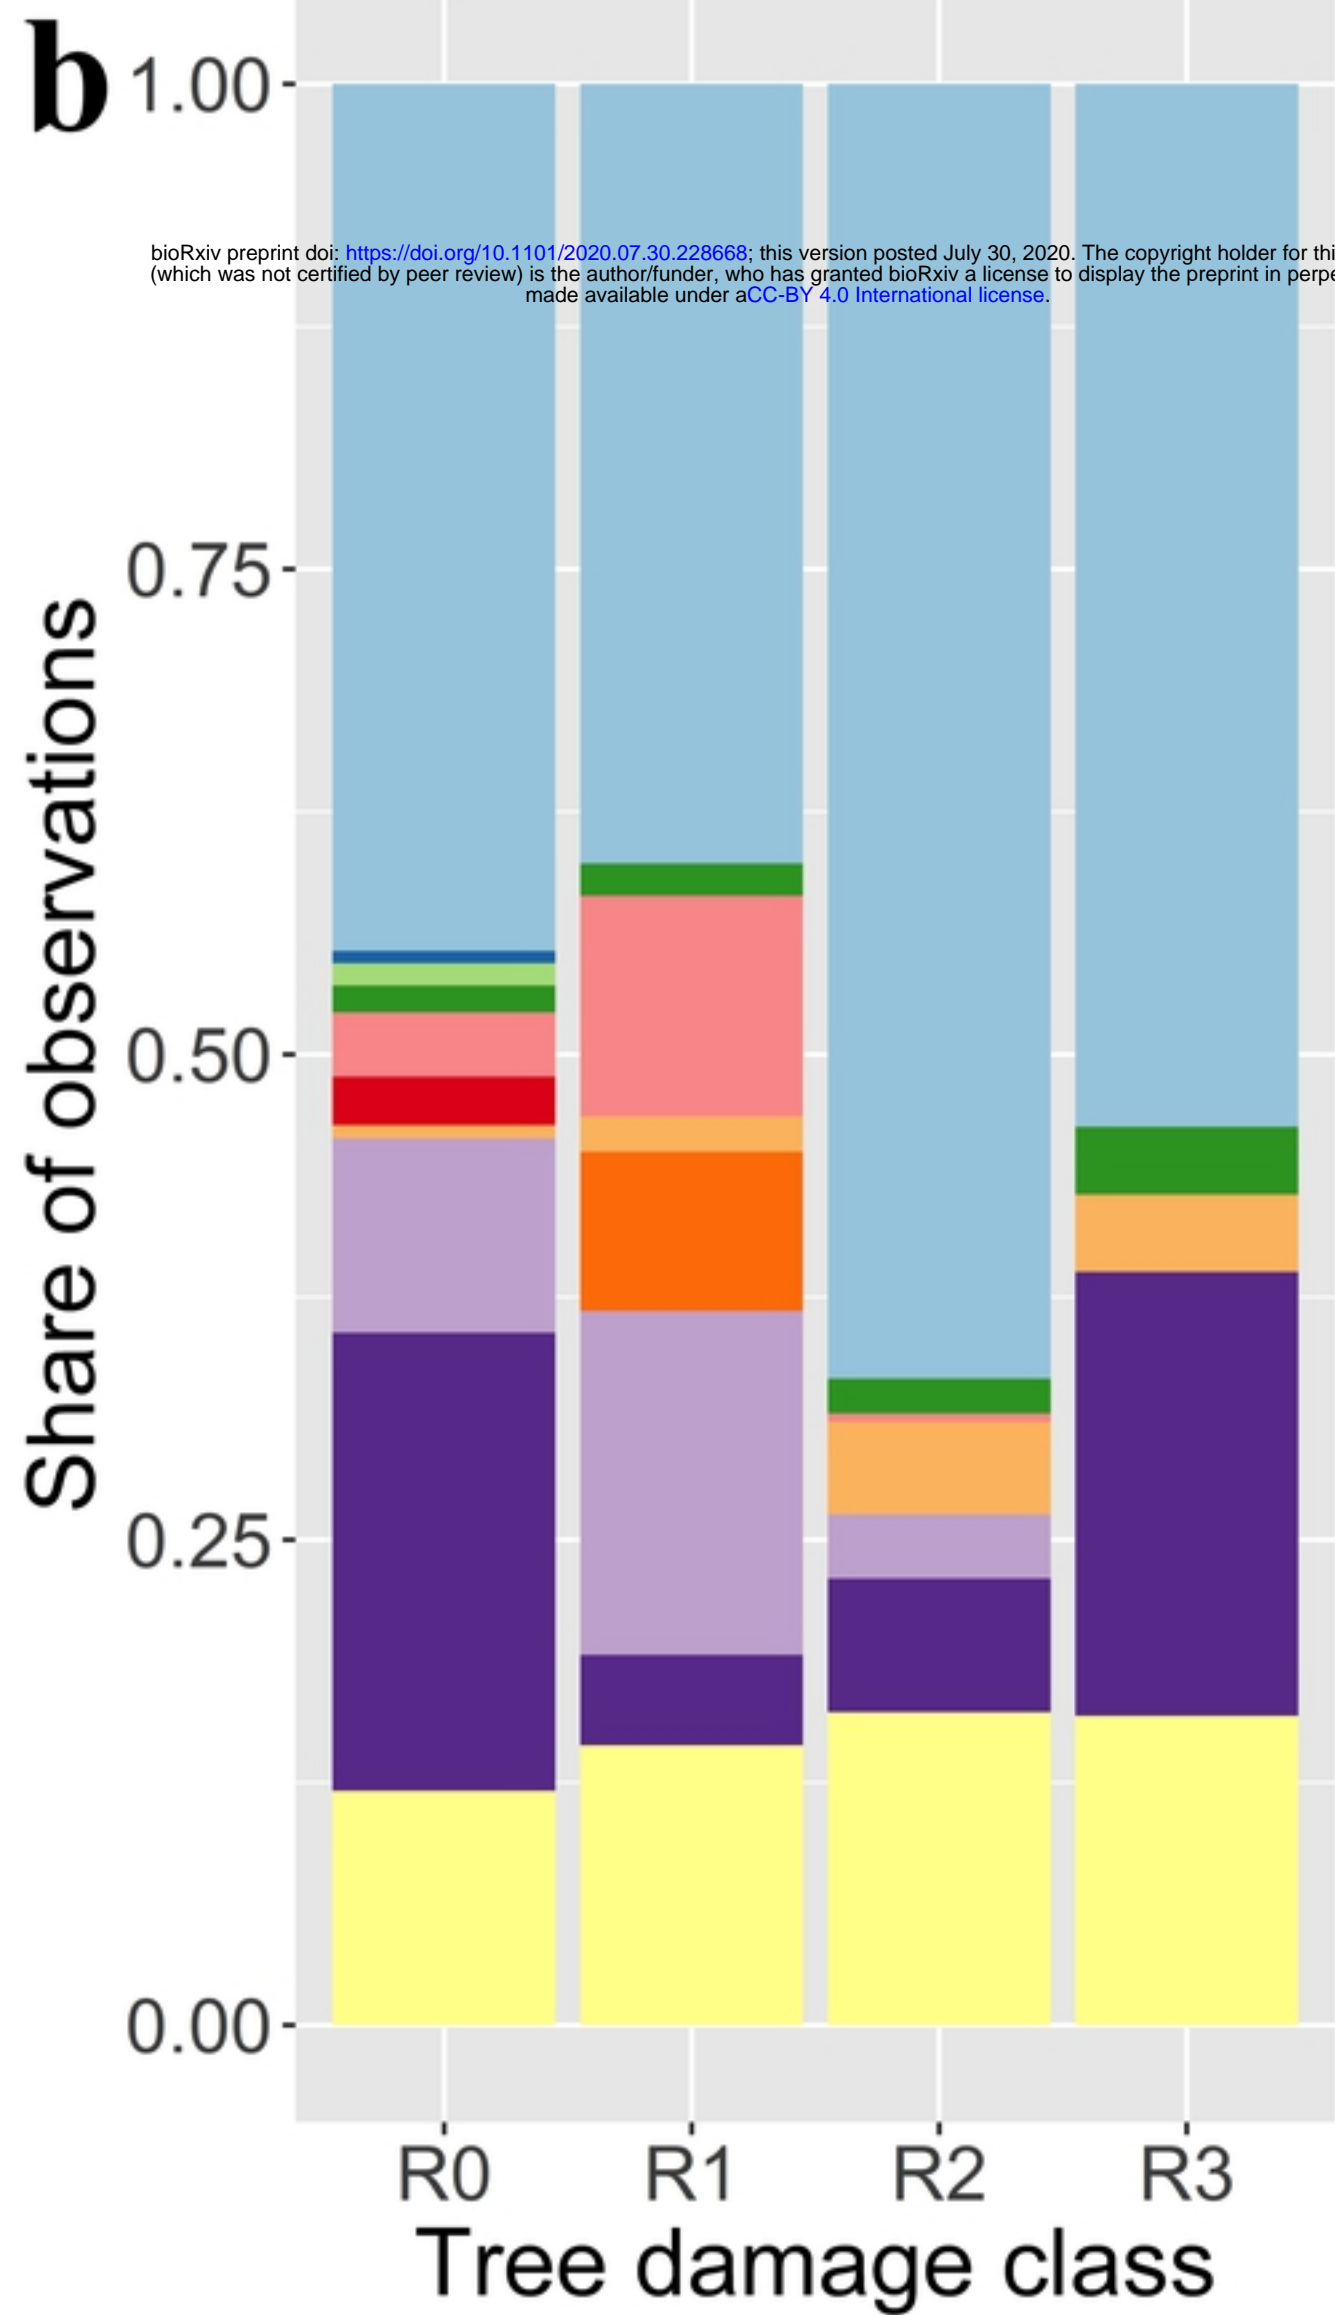

## Species

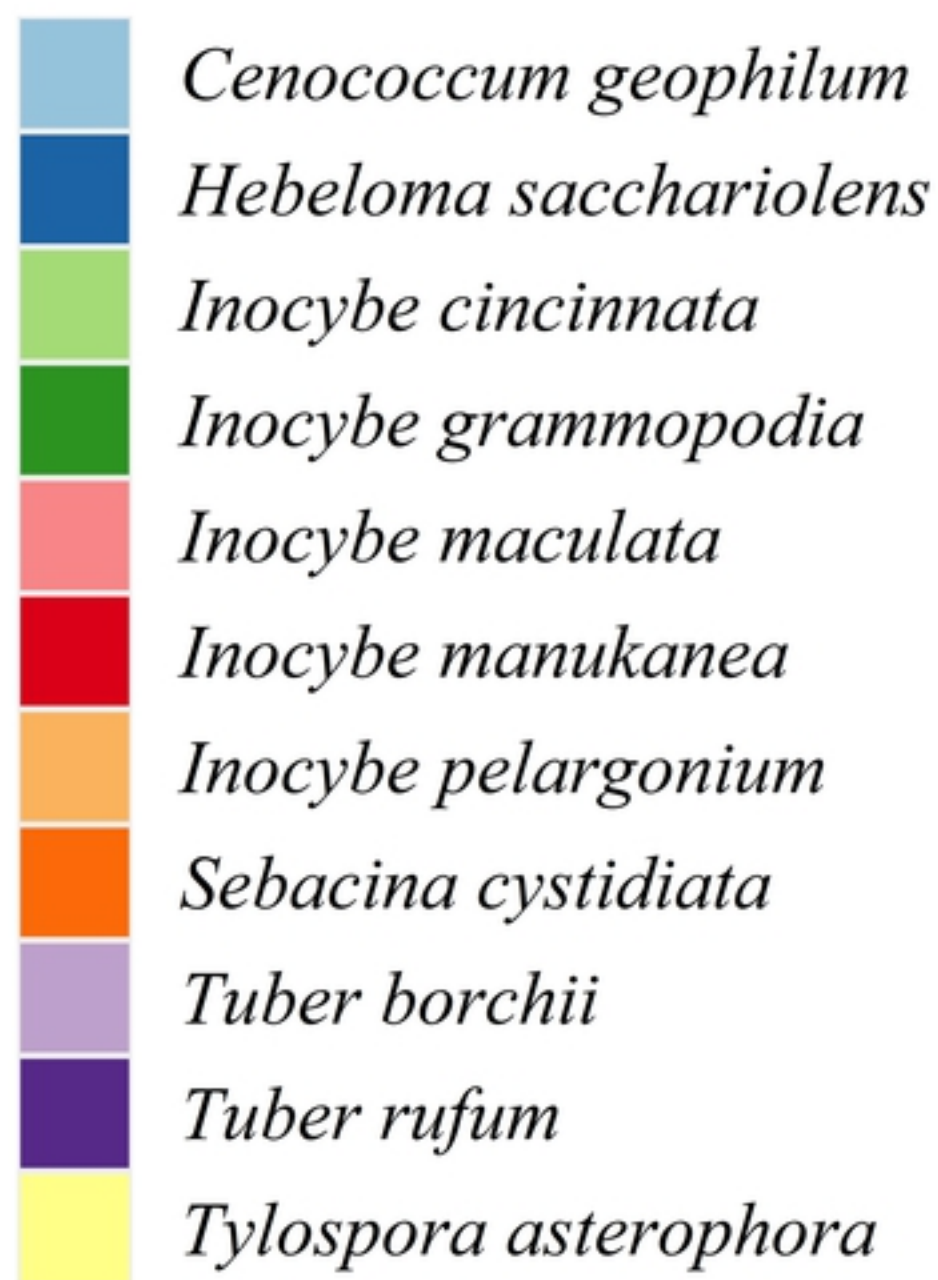

Figure 2b

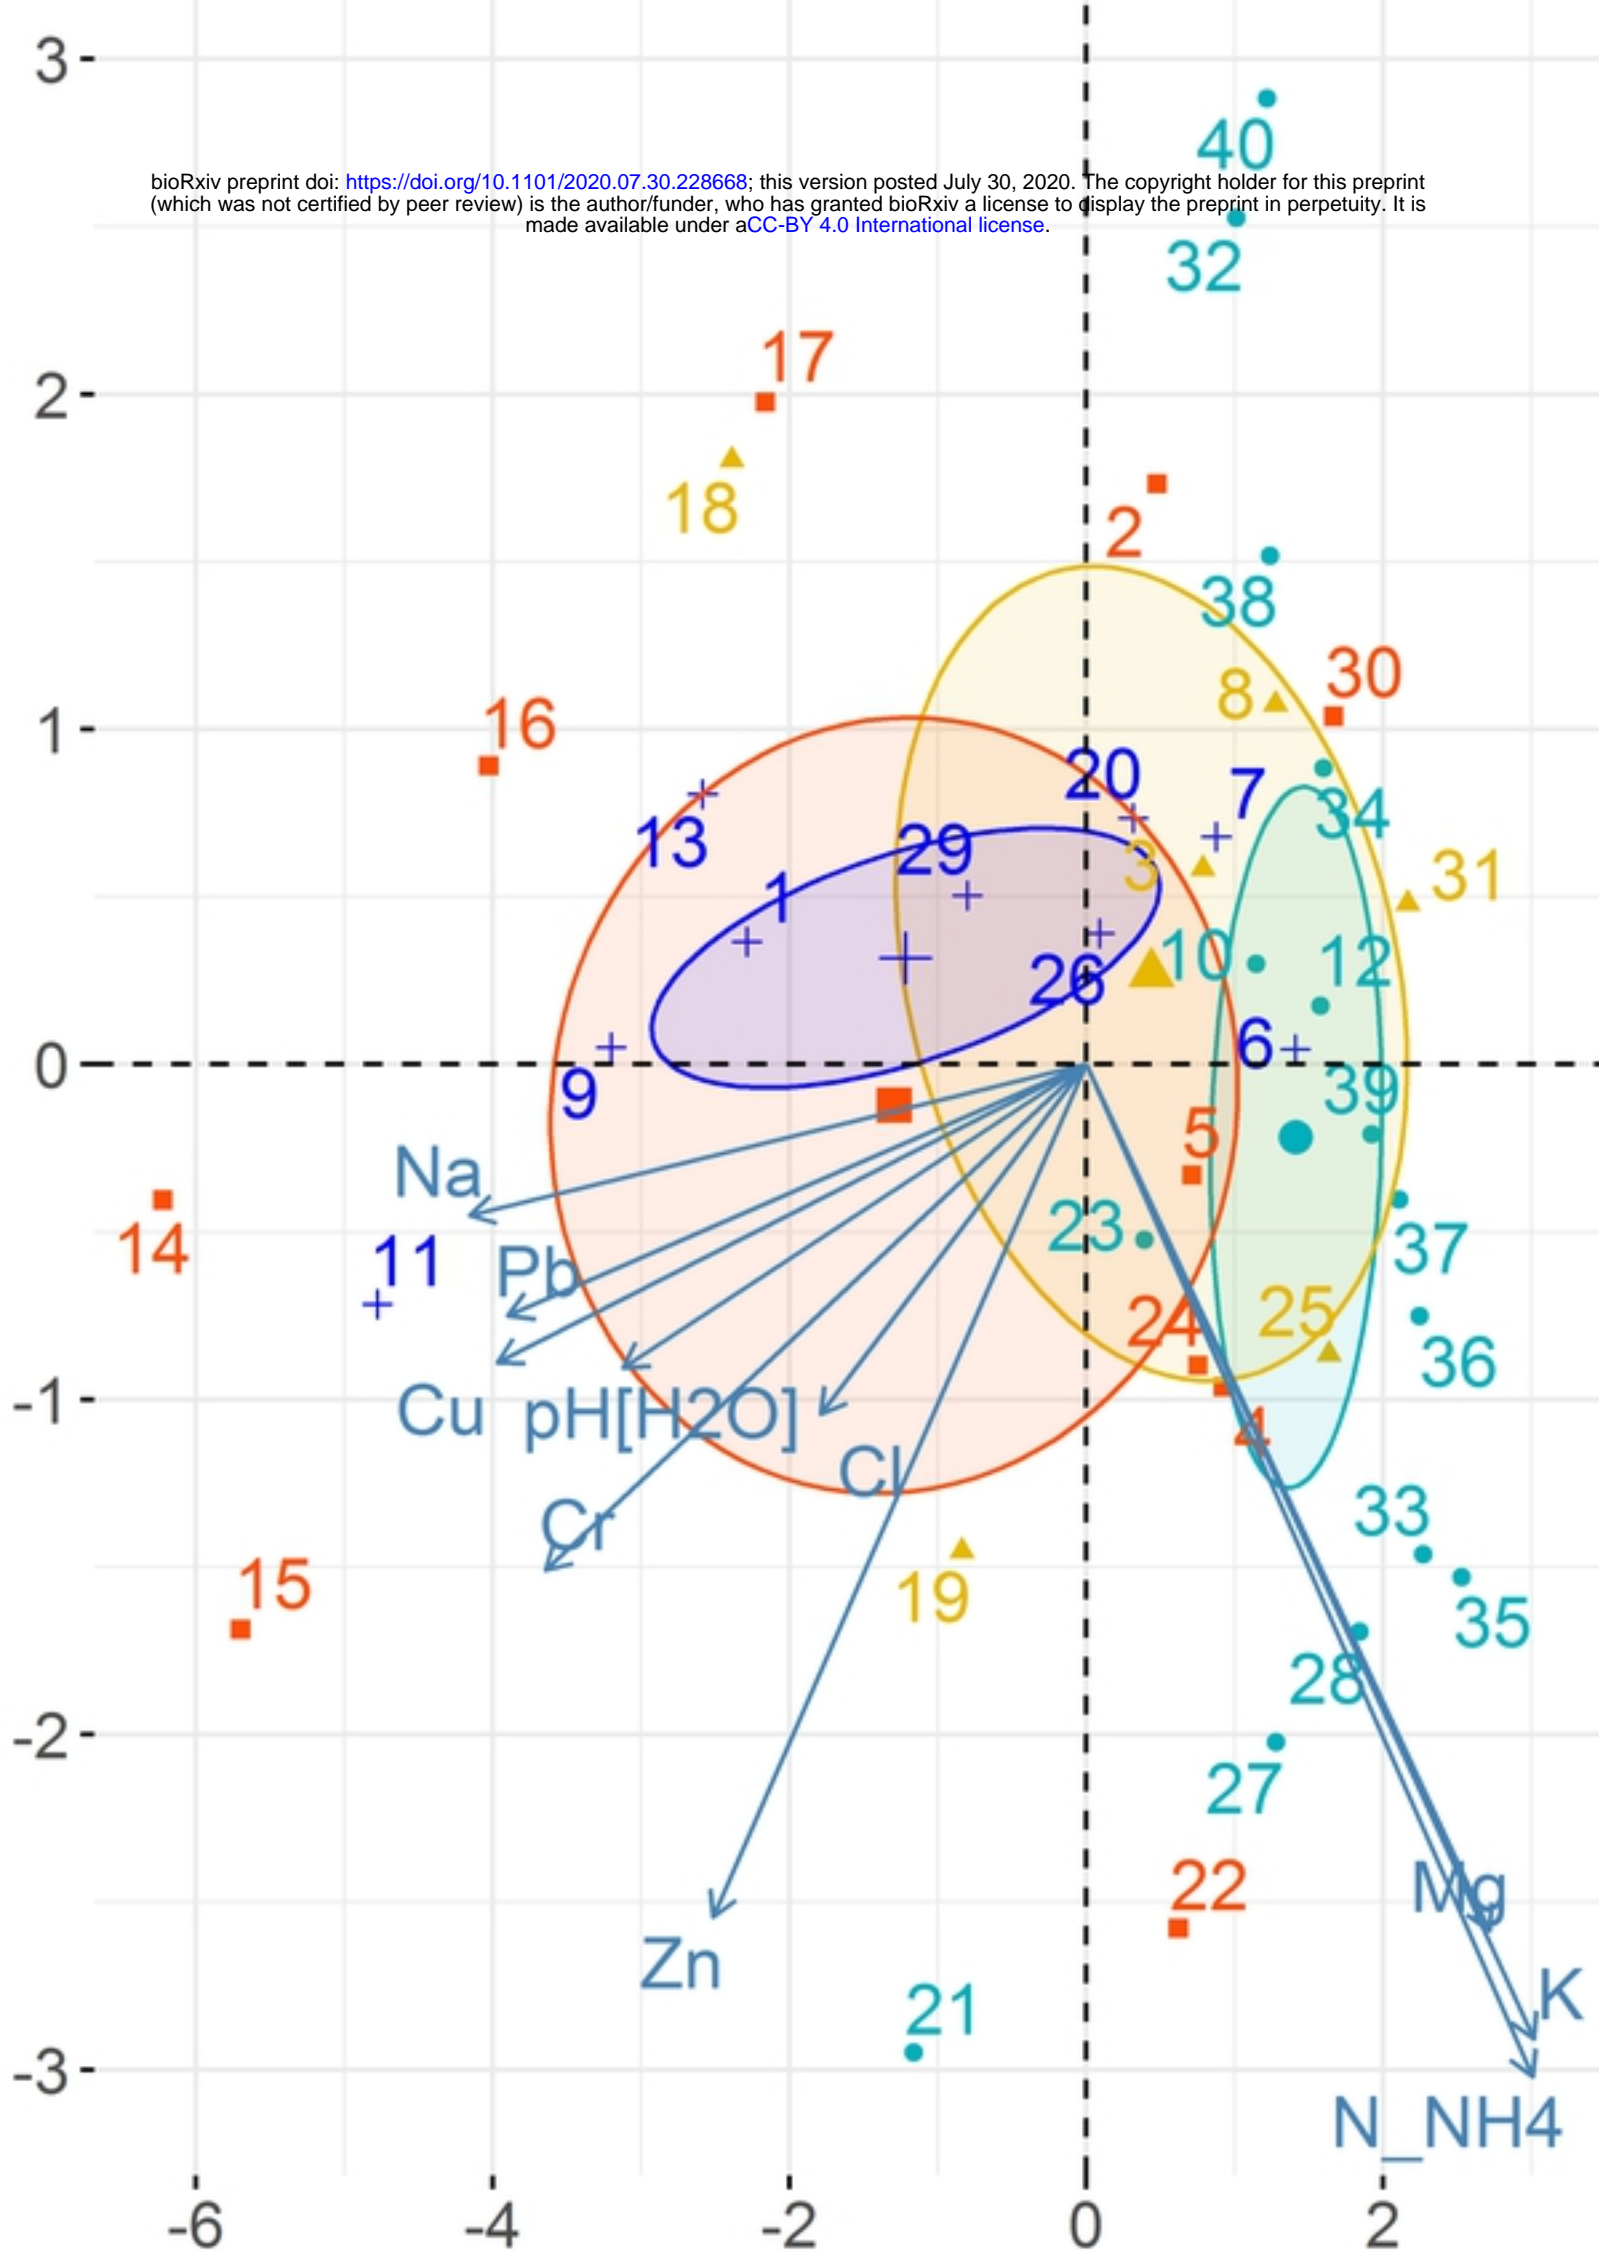

### Tree damage class

- R0
- R1
- R2
- R3

Figure 3
